# Supplementary material
Source: publisher figshare collection journal article supplement (https://diabetesjournals.figshare.com/ndownloader/files/26193239)

An age-related exponential decline in the risk of multiple islet autoantibody seroconversion during childhood

Short running title: Islet autoimmunity risk declines exponentially

Ezio Bonifacio PhD<sup>\*1,2</sup>, Andreas Weiß MSc<sup>3</sup>, Christiane Winkler PhD<sup>3,4</sup>, Markus Hippich PhD<sup>3</sup>, Marian J. Rewers MD<sup>5</sup>, Jorma Toppari MD<sup>6</sup>, Åke Lernmark PhD<sup>7</sup>, Jin-Xiong She<sup>8</sup>, William A. Hagopian<sup>9</sup>, Jeffrey P. Krischer<sup>10</sup>, Kendra Vehik<sup>10</sup>, Desmond A. Schatz<sup>11</sup>, Beena Akolkar<sup>12</sup>, Anette-Gabriele Ziegler MD<sup>\*3,4,13</sup> for the TEDDY Study Group

\*Shared corresponding authorship

## **Online-Only Supplemental Material**

The TEDDY Study Group members

HLA eligibility

### **Supplemental Table 1:**

Characteristics of the study population (n = 8,556).

### **Supplemental Figure 1:**

Flow diagram of study participants and islet autoantibody outcomes.

### **Supplemental Table 2:**

Cumulative five-year horizon risk for any and multiple islet autoantibodies from respective landmark age.

### **Supplemental Table 3:**

Cumulative five-year horizon risk for multiple islet autoantibodies from respective landmark age by first degree family history (FDR) status.

### **Supplemental Table 4:**

Cumulative five-year horizon risk for multiple islet autoantibodies from respective landmark age by sex.

**Supplemental Table 5:**

Cumulative five-year horizon risk for multiple islet autoantibodies from respective landmark age by HLA genotype.

**Supplemental Table 6:**

Cumulative five-year horizon risk for multiple islet autoantibodies from respective landmark age by genetic risk score in general population children with the HLA DR3/4-DQ8 or DR4-DQ8/DR4-DQ8 genotypes.

**Supplemental Figure 2:**

Exponential risk decay curves for multiple islet autoantibodies stratified by children in European and U.S. sites, sex, and *INS* genotype; and relative 5-year risks for multiple islet autoantibodies.

**Supplemental Table 7:**

Relative cumulative five-year horizon risks for multiple islet autoantibodies and respective 95% confidence intervals at different timepoints.

**Supplemental Table 8:**

Cumulative five-year horizon risk for islet autoantibody phenotypes from respective landmark age.

**Supplemental Figure 3:**

Exponential risk decay curves for islet autoantibody phenotypes stratified by HLA genotype.

**Supplemental Table 9:**

Cumulative 5-year risk for islet autoantibody phenotypes from respective landmark age by HLA genotype.

**Supplemental Table 10:**

Sensitivity and positive predictive value of screening for islet autoantibodies.

**Supplemental Figure 4:**

Models of multiple islet autoantibody pathogenesis based on the landmark analysis of the TEDDY study.

## **The TEDDY Study Group**

**Colorado Clinical Center:** Marian Rewers, M.D., Ph.D., PI<sup>1,4,5,6,9,10</sup>, Aaron Barbour, Kimberly Bautista<sup>11</sup>, Judith Baxter<sup>8,9,11</sup>, Daniel Felipe-Morales, Kimberly Driscoll, Ph.D.<sup>8</sup>, Brigitte I. Frohnert, M.D.<sup>2,13</sup>, Marisa Stahl, M.D.<sup>12</sup>, Patricia Gesualdo<sup>2,6,11,13</sup>, Michelle Hoffman<sup>11,12,13</sup>, Rachel Karban<sup>11</sup>, Edwin Liu, M.D.<sup>12</sup>, Jill Norris, Ph.D.<sup>2,3,11</sup>, Stesha Peacock, Hanan Shorosh, Andrea Steck, M.D.<sup>3,13</sup>, Megan Stern, Erica Villegas<sup>2</sup>, Kathleen Waugh<sup>6,7,11</sup>. University of Colorado, Anschutz Medical Campus, Barbara Davis Center for Childhood Diabetes.

**Finland Clinical Center:** Jorma Toppari, M.D., Ph.D., PI<sup>¥^1,4,10,13</sup>, Olli G. Simell, M.D., Ph.D., Annika Adamsson, Ph.D.<sup>^11</sup>, Suvi Ahonen<sup>\*±§</sup>, Mari Åkerlund<sup>\*±§</sup>, Leena Hakola\*, Anne Hekkala, M.D.<sup>μ±</sup>, Henna Holappa<sup>μ±</sup>, Heikki Hyöty, M.D., Ph.D.<sup>\*±6</sup>, Anni Ikonen<sup>μ±</sup>, Jorma Ilonen, M.D., Ph.D.<sup>¥¶3</sup>, Sinikka Jäminki<sup>\*±</sup>, Sanna Jokipuu<sup>^</sup>, Leena Karlsson<sup>^</sup>, Jukka Kero M.D., Ph.D.<sup>¥^</sup>, Miia Kähönen<sup>μ±11,13</sup>, Mikael Knip, M.D., Ph.D.<sup>\*±5</sup>, Minna-Liisa Koivikko<sup>μ±</sup>, Merja Koskinen<sup>\*±</sup>, Mirva Koreasalo<sup>\*±§2</sup>, Kalle Kurppa, M.D., Ph.D.<sup>\*±12</sup>, Jarita Kytölä<sup>\*±</sup>, Jutta Laiho, Ph.D.<sup>\*6</sup>, Tiina Latva-aho<sup>μ±</sup>, Katri Lindfors, Ph.D.<sup>\*12</sup>, Maria Lönnrot, M.D., Ph.D.<sup>\*±6</sup>, Elina Mäntymäki<sup>^</sup>, Markus Mattila\*, Maija Miettinen<sup>§2</sup>, Katja Multasuo<sup>μ±</sup>, Teija Mykkänen<sup>μ±</sup>, Tiina Niininen<sup>±\*11</sup>, Sari Niinistö<sup>±§2</sup>, Mia Nyblom<sup>\*±</sup>, Sami Oikarinen, Ph.D.<sup>\*±6</sup>, Paula Ollikainen<sup>μ±</sup>, Zhian Othmani<sup>^</sup>, Sirpa Pohjola<sup>μ±</sup>, Petra Rajala<sup>^</sup>, Jenna Rautanen<sup>±§</sup>, Anne Riikonen<sup>\*±§2</sup>, Eija Riski<sup>^</sup>, Miia Pekkola<sup>\*±</sup>, Minna Romo<sup>^</sup>, Satu Ruohonen<sup>^</sup>, Satu Simell, M.D., Ph.D.<sup>¥12</sup>, Maija Sjöberg<sup>^</sup>, Aino Stenius<sup>μ±11</sup>, Päivi Tossavainen, M.D.<sup>μ±</sup>, Mari Vähä-Mäkilä<sup>¥</sup>, Sini Vainionpää<sup>^</sup>, Eeva Varjonen<sup>^11</sup>, Riitta Veijola, M.D., Ph.D.<sup>μ±13</sup>, Irene Viinikangas<sup>μ±</sup>, Suvi M. Virtanen, M.D., Ph.D.<sup>\*±§2</sup>.

¥University of Turku, \*Tampere University, μUniversity of Oulu, ^Turku University Hospital, Hospital District of Southwest Finland, ±Tampere University Hospital, °Oulu University Hospital, §National Institute for Health and Welfare, Finland, ¶University of Kuopio.

**Georgia/Florida Clinical Center:** Jin-Xiong She, Ph.D., PI<sup>1,3,4,10</sup>, Desmond Schatz, M.D.<sup>\*4,5,7,8</sup>, Diane Hopkins<sup>11</sup>, Leigh Steed<sup>11,12,13</sup>, Jennifer Bryant<sup>11</sup>, Katherine Silvis<sup>2</sup>, Michael Haller, M.D.<sup>\*13</sup>, Melissa Gardiner<sup>11</sup>, Richard McIndoe, Ph.D., Ashok Sharma, Stephen W. Anderson, M.D.<sup>^</sup>, Laura Jacobsen, M.D.<sup>\*13</sup>, John Marks, DHSc.<sup>\*11,13</sup>, P.D. Towe\*. Center for Biotechnology and Genomic Medicine, Augusta University. \*University of Florida, ^Pediatric Endocrine Associates, Atlanta.

**Germany Clinical Center:** Anette G. Ziegler, M.D., PI<sup>1,3,4,10</sup>, Ezio Bonifacio Ph.D.<sup>\*5</sup>, Cigdem Gezgin, Anja Heublein, Eva Hohoff<sup>¥2</sup>, Sandra Hummel, Ph.D.<sup>2</sup>, Annette Knopff<sup>7</sup>, Charlotte Koch, Sibylle Koletzko, M.D.<sup>¶12</sup>, Claudia Ramminger<sup>11</sup>, Roswith Roth, Ph.D.<sup>8</sup>, Jennifer Schmidt, Marlon Scholz, Joanna Stock<sup>8,11,13</sup>, Katharina Warncke, M.D.<sup>13</sup>, Lorena Wendel, Christiane Winkler, Ph.D.<sup>2,11</sup>. Forschergruppe Diabetes e.V. and Institute of Diabetes Research, Helmholtz Zentrum München, Forschergruppe Diabetes, and Klinikum rechts der Isar, Technische Universität München. \*Center for Regenerative Therapies, TU Dresden, ¶Dr. von Hauner

Children's Hospital, Department of Gastroenterology, Ludwig Maximillians University Munich,  
¥University of Bonn, Department of Nutritional Epidemiology.

**Sweden Clinical Center:** Åke Lernmark, Ph.D., PI<sup>1,3,4,5,6,8,9,10</sup>, Daniel Agardh, M.D., Ph.D.<sup>6,12</sup>, Carin Andrén Aronsson, Ph.D.<sup>2,11,12</sup>, Maria Ask, Rasmus Bennet, Corrado Cilio, Ph.D., M.D.<sup>5,6</sup>, Susanne Dahlberg, Helene Engqvist, Emelie Ericson-Hallström, Annika Björne Fors, Lina Fransson, Thomas Gard, Monika Hansen, Hanna Jisser, Fredrik Johansen, Berglind Jonsdottir, M.D., Ph.D.<sup>11</sup>, Helena Elding Larsson, M.D., Ph.D.<sup>6,13</sup>, Marielle Lindström, Markus Lundgren, M.D., Ph.D.<sup>13</sup>, Marlena Maziarz, Ph.D., Maria Månsson-Martinez, Jessica Melin<sup>11</sup>, Zeliha Mestan, Caroline Nilsson, Karin Ottosson, Kobra Rahmati, Anita Ramelius, Falastin Salami, Anette Sjöberg, Birgitta Sjöberg, Carina Törn, Ph.D.<sup>3</sup>, Åsa Wimar<sup>13</sup>. Lund University.

**Washington Clinical Center:** William A. Hagopian, M.D., Ph.D., PI<sup>1,3,4,5,6,7,10,12,13</sup>, Michael Killian<sup>6,7,11,12</sup>, Claire Cowen Crouch<sup>11,13</sup>, Jennifer Skidmore<sup>2</sup>, Masumeh Chavoshi, Arlene Meyer, Jocelyn Meyer, Denise Mulenga<sup>11</sup>, Nole Powell, Jared Radtke, Matei Romancik, Shreya Roy, Davey Schmitt, Sarah Zink. Pacific Northwest Research Institute.

**Pennsylvania Satellite Center:** Dorothy Becker, M.D., Margaret Franciscus, MaryEllen Dalmagro-Elias Smith<sup>2</sup>, Ashi Daftary, M.D., Mary Beth Klein, Chrystal Yates. Children's Hospital of Pittsburgh of UPMC.

**Data Coordinating Center:** Jeffrey P. Krischer, Ph.D., PI<sup>1,4,5,9,10</sup>, Sarah Austin-Gonzalez, Maryouri Avendano, Sandra Baethke, Brant Burkhardt, Ph.D.<sup>5,6</sup>, Martha Butterworth<sup>2</sup>, Joanna Clasen, David Cuthbertson, Christopher Eberhard, Steven Fiske<sup>8</sup>, Jennifer Garmeson, Veena Gowda, Kathleen Heyman, Belinda Hsiao, Christina Karges, Francisco Perez Laras, Qian Li, Ph.D.<sup>2,3</sup>, Shu Liu, Xiang Liu, Ph.D.<sup>2,3,8,13</sup>, Kristian Lynch, Ph.D.<sup>5,6,8</sup>, Jamie Malloy, Cristina McCarthy<sup>11</sup>, Hemang Parikh, Ph.D.<sup>3</sup>, Cassandra Remedios, Chris Shaffer, Laura Smith, Ph.D.<sup>8,11</sup>, Susan Smith<sup>11</sup>, Noah Sulman, Ph.D., Roy Tamura, Ph.D.<sup>1,2,11,12,13</sup>, Dena Tewey, Michael Toth, Ulla Uusitalo, Ph.D.<sup>2</sup>, Kendra Vehik, Ph.D.<sup>4,5,6,8,13</sup>, Ponni Vijayakandipan, Jimin Yang, Ph.D., R.D.<sup>2</sup>. *Past staff: Michael Abbondandolo, Lori Ballard, Rasheedah Brown, Stephen Dankyi, David Hadley, Ph.D., Hye-Seung Lee, Ph.D., Colleen Maguire, Wendy McLeod, Aubrie Merrell, Steven Meulemans, Ryan Quigley.* University of South Florida.

**Project scientist:** Beena Akolkar, Ph.D.<sup>1,3,4,5,6,7,9,10</sup>. National Institutes of Diabetes and Digestive and Kidney Diseases.

**Autoantibody Reference Laboratories:** Liping Yu, M.D.<sup>^5</sup>, Dongmei Miao, M.D.<sup>^</sup>, Polly Bingley, M.D., FRCP<sup>\*5</sup>, Alistair Williams\*, Kyla Chandler\*, Ilana Kelland\*, Yassin Ben Khoud\*, Huma Zahid\*, Matthew Randell \*. <sup>^</sup>Barbara Davis Center for Childhood Diabetes, University of Colorado Denver, \*Bristol Medical School, University of Bristol, UK.

**HLA Reference Laboratory:** William Hagopian<sup>3</sup>, MD, PhD, Masumeh Chavoshi, Jared Radtke, Sarah Zink. Pacific Northwest Research Institute, Seattle WA. (Previously Henry Erlich, Ph.D.<sup>3</sup>, Steven J. Mack, Ph.D., Anna Lisa Fear. Center for Genetics, Children's Hospital Oakland Research Institute.)

**SNP Laboratory:** Stephen S. Rich, Ph.D.<sup>3</sup>, Wei-Min Chen, Ph.D.<sup>3</sup>, Suna Onengut-Gumuscu, Ph.D.<sup>3</sup>, Emily Farber, Rebecca Roche Pickin, Ph.D., Jonathan Davis, Jordan Davis, Dan Gallo, Jessica Bonnie, Paul Campolieto. Center for Public Health Genomics, University of Virginia.

**Repository:** Sandra Ke, Niveen Mulholland, Ph.D. NIDDK Biosample Repository at Fisher BioServices.

**Other contributors:** Thomas Briesse, Ph.D.<sup>6</sup>, Columbia University. Suzanne Bennett Johnson, Ph.D.<sup>8,11</sup>, Florida State University. Eric Triplett, Ph.D.<sup>6</sup>, University of Florida.

***Committees:***

<sup>1</sup>Ancillary Studies, <sup>2</sup>Diet, <sup>3</sup>Genetics, <sup>4</sup>Human Subjects/Publicity/Publications, <sup>5</sup>Immune Markers, <sup>6</sup>Infectious Agents, <sup>7</sup>Laboratory Implementation, <sup>8</sup>Psychosocial, <sup>9</sup>Quality Assurance, <sup>10</sup>Steering, <sup>11</sup>Study Coordinators, <sup>12</sup>Celiac Disease, <sup>13</sup>Clinical Implementation.

## HLA eligibility

The high-risk genotypes for participants screened from the general population were as follows: DRB1\*04-DQA1\*03-DQB1\*03:02/DRB1\*03-DQA1\*05-DQB1\*02:01 (DR3/4), DRB1\*04-DQA1\*03-DQB1\*03:02/DRB1\*04-DQA1\*03-DQB1\*03:02 (DR4/4), DRB1\*04-DQA1\*03-DQB1\*03:02/DRB1\*08-DQA1\*04-DQB1\*04:02 (DR4/8) and DRB1\*03-DQA1\*05-DQB1\*02:01/DRB1\*03-DQA1\*05-DQB1\*02:01 (DR3/3). Additional genotypes were included for first degree relatives (FDRs) of a subject with T1D: DRB1\*04-DQA1\*03-DQB1\*03:02/DRB1\*04-DQA1\*03-DQB1\*02:02 (DR4/4b), DRB1\*04-DQA1\*03-DQB1\*03:02/DRB1\*01-DQA1\*01-DQB1\*05:01 (DR4/1), DRB1\*04-DQA1\*03-DQB1\*03:02/DRB1\*13-DQA1\*01-DQB1\*06:04 (DR4/13), DRB1\*04-DQA1\*03-DQB1\*03:02/DRB1\*09-DQA1\*03-DQB1\*03:03 (DR4/9), and DRB1\*03-DQA1\*05-DQB1\*02:01/DRB1\*09-DQA1\*03-DQB1\*03:03 (DR3/9).

Supplemental Table 1: Characteristics of the study population ( $n = 8,556$ )

| Variable (n)                               | Category                                      | Number (%)   | Risk of multiple islet autoantibodies by age 12 years [95% CI] |
|--------------------------------------------|-----------------------------------------------|--------------|----------------------------------------------------------------|
| Sex                                        | Girls                                         | 4,226 (49.4) | 5.2% [4.5 – 5.9]                                               |
|                                            | Boys                                          | 4,330 (50.6) | 6.4% [5.6 – 7.2]                                               |
| First-degree relative with type 1 diabetes | Yes                                           | 955 (11.2)   | 12.4% [10.2 – 14.6]                                            |
|                                            | No                                            | 7,601 (88.8) | 5.0% [4.5 – 5.5]                                               |
| Site                                       | Europe                                        | 4,895 (57.2) | 6.7 % [5.9 – 7.4]                                              |
|                                            | U.S.A.                                        | 3,661 (42.8) | 4.7 % [3.9 – 5.5]                                              |
| HLA genotype                               | <i>DR3/DR4-DQ8</i>                            | 3,339 (39.0) | 8.0% [7.0 – 8.9]                                               |
|                                            | <i>DR4-DQ8/DR4-DQ8</i>                        | 1,674 (19.6) | 6.2% [5.0 – 7.4]                                               |
|                                            | <i>DR4-DQ8/DR8</i>                            | 1,474 (17.2) | 4.5% [3.4 – 5.7]                                               |
|                                            | <i>DR3/DR3</i>                                | 1,791 (20.9) | 2.2% [1.4 – 3.0]                                               |
|                                            | Other*                                        | 278 (3.3)    | 7.3% [4.2 – 10.4]                                              |
| Genetic risk score†<br>(n=4,413)           | Highest quartile                              | 1,104 (25)   | 12.8% [10.8 – 14.8]                                            |
|                                            | 2 <sup>nd</sup> and 3 <sup>rd</sup> quartiles | 2,206 (50)   | 7.8% [6.6 – 8.9]                                               |
|                                            | Lowest quartile                               | 1,103 (25)   | 4.1% [2.9 – 5.4]                                               |

\*All of the other *HLA DR4-DQ8*-containing genotypes were in children with a first-degree relative with type 1 diabetes

†Only calculated in general population children with complete SNP data and the *HLA DR3/DR4-DQ8* or *DR4-DQ8/DR4-DQ8* genotypes

Supplemental Figure 1: Flow diagram of study participants and islet autoantibody outcomes.

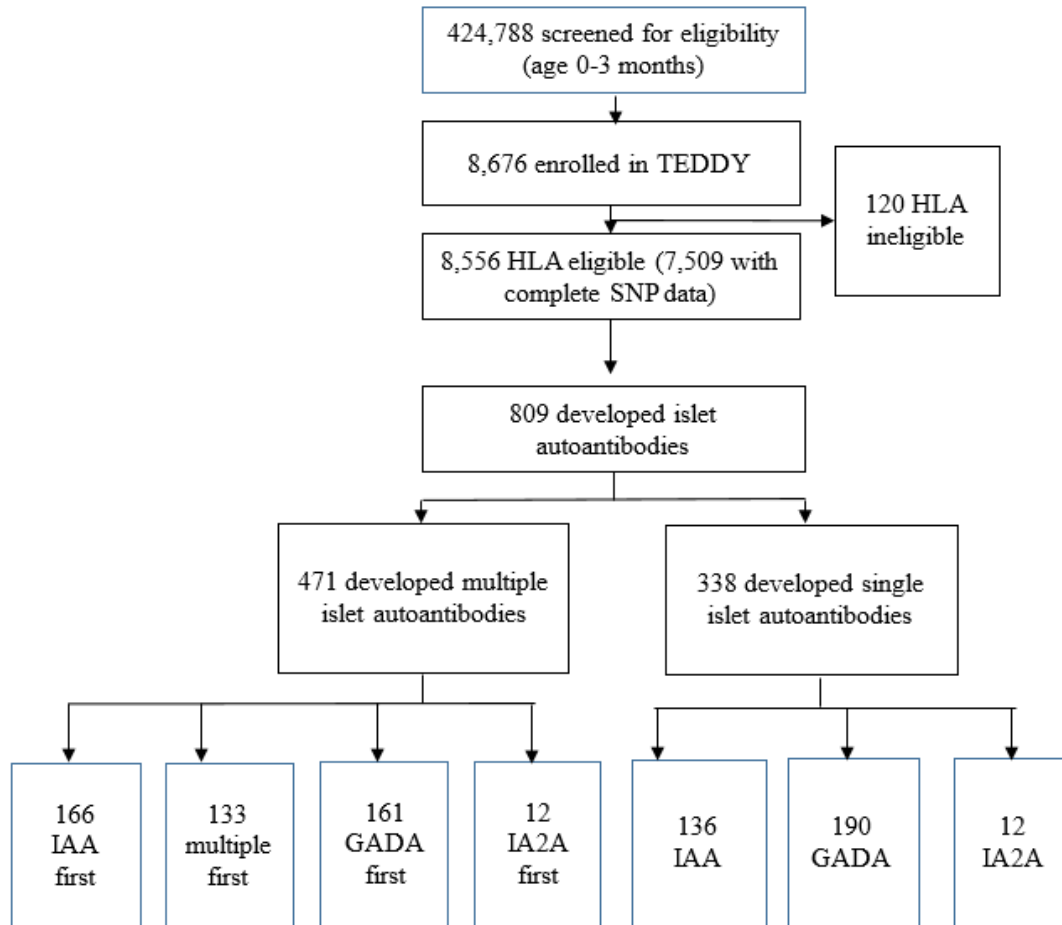



Supplemental Table 2: Cumulative five-year horizon risk for any and multiple islet autoantibodies from respective landmark age

| <b>Landmark age</b> | <b>Any islet autoantibodies</b> | <b>Multiple islet autoantibodies</b> |
|---------------------|---------------------------------|--------------------------------------|
| From 7.5 months     | 6.3% [5.7-6.8]                  | 4.2% [3.8-4.7]                       |
| From 1.125 years    | 5.4% [4.9-5.9]                  | 4.3% [3.9-4.7]                       |
| From 1.625 years    | 4.8% [4.3-5.2]                  | 3.5% [3.1-3.9]                       |
| From 2.125 years    | 4.1% [3.7-4.5]                  | 2.9% [2.6-3.3]                       |
| From 2.625 years    | 3.7% [3.3-4.2]                  | 2.4% [2.1-2.8]                       |
| From 3.125 years    | 3.4% [3.0-3.8]                  | 2.0% [1.7-2.3]                       |
| From 3.625 years    | 3.3% [2.9-3.7]                  | 1.7% [1.4-2.0]                       |
| From 4.25 years     | 3.2% [2.8-3.6]                  | 1.6% [1.3-1.9]                       |
| From 5.25 years     | 3.1% [2.7-3.5]                  | 1.5% [1.2-1.8]                       |
| From 6.25 years     | 3.2% [2.7-3.6]                  | 1.3% [1.0-1.5]                       |
| From 7.25 years     | 3.3% [2.7-3.9]                  | 1.1% [0.8-1.3]                       |
| From 8.25 years     | 3.3% [2.5-4.0]                  | 1.1% [0.8-1.5]                       |

Supplemental Table 3: Cumulative five-year horizon risk for multiple islet autoantibodies from respective landmark age by first degree family history (FDR) status

| Landmark age     | Risk after 5 years<br>of follow-up | Risk after 5 years of<br>follow-up |
|------------------|------------------------------------|------------------------------------|
|                  | FDR                                | No FDR                             |
| From 7.5 months  | 9.9% [8.0-11.8]                    | 3.6% [3.2-4.0]                     |
| From 1.125 years | 7.7% [5.9-9.4]                     | 3.0% [2.6-3.4]                     |
| From 1.625 years | 6.2% [4.6-7.8]                     | 2.5% [2.2-2.9]                     |
| From 2.125 years | 4.9% [3.4-6.3]                     | 2.1% [1.8-2.5]                     |
| From 2.625 years | 4.0% [2.7-5.3]                     | 1.8% [1.5-2.1]                     |
| From 3.125 years | 3.2% [2.0-4.4]                     | 1.5% [1.2-1.8]                     |
| From 3.625 years | 3.3% [2.1-4.5]                     | 1.4% [1.1-1.7]                     |
| From 4.25 years  | 2.9% [1.7-4.1]                     | 1.3% [1.1-1.6]                     |
| From 5.25 years  | 2.0% [1.0-3.0]                     | 1.2% [0.9-1.5]                     |
| From 6.25 years  | 1.9% [0.9-2.8]                     | 1.0% [0.7-1.3]                     |
| From 7.25 years  | 1.8% [0.6-3.0]                     | 1.0% [0.7-1.4]                     |
| From 8.25 years  | 1.5% [0.4-2.7]                     | 0.8% [0.5-1.1]                     |

Supplemental Table 4: Cumulative five-year horizon risk for multiple islet autoantibodies from respective landmark age by sex

| Landmark age     | Risk after 5 years<br>of follow-up | Risk after 5 years<br>of follow-up |
|------------------|------------------------------------|------------------------------------|
|                  | Male                               | Female                             |
| From 7.5 months  | 4.8% [4.1-5.4]                     | 3.8% [3.2-4.4]                     |
| From 1.125 years | 3.7% [3.2-4.3]                     | 3.3% [2.7-3.8]                     |
| From 1.625 years | 3.2% [2.7-3.8]                     | 2.6% [2.1-3.1]                     |
| From 2.125 years | 2.9% [2.4-3-4]                     | 2.0% [1.5-2.4]                     |
| From 2.625 years | 2.4% [1.9-2.8]                     | 1.7% [1.3-2.1]                     |
| From 3.125 years | 2.0% [1.5-2.4]                     | 1.4% [1.0-1.7]                     |
| From 3.625 years | 1.9% [1.4-2.3]                     | 1.4% [1.0-1.7]                     |
| From 4.25 years  | 1.7% [1.3-2.1]                     | 1.3% [0.9-1.7]                     |
| From 5.25 years  | 1.6% [1.2-2.1]                     | 1.2% [0.8-1.5]                     |
| From 6.25 years  | 1.2% [0.8-1.7]                     | 1.1% [0.7-1.7]                     |
| From 7.25 years  | 1.1% [0.6-1.5]                     | 1.2% [0.7-1.7]                     |
| From 8.25 years  | 0.8% [0.4-1.1]                     | 1.0% [0.5-1.5]                     |

Supplemental Table 5: Cumulative five-year horizon risk for multiple islet autoantibodies from respective landmark age by *HLA* genotype

| Landmark age    | DR3/4-DQ8      | DR4-DQ8/DR4-DQ8 | DR4-DQ8/DR8    | DR3/3          |
|-----------------|----------------|-----------------|----------------|----------------|
| From 7.5        | 6.2% [5.3-7.0] | 4.1% [3.2-5.1]  | 3.0% [2.2-3.9] | 1.7% [1.1-2.3] |
| From 1.125      | 5.1% [4.3-5.9] | 3.7% [2.8-4.6]  | 2.0% [1.3-2.8] | 1.3% [0.7-1.8] |
| From 1.625      | 4.4% [3.7-5.1] | 3.4% [2.5-4.3]  | 1.5% [0.9-2.1] | 0.8% [0.4-1.2] |
| From 2.125      | 3.6% [3.0-4.3] | 2.9% [2.1-3.7]  | 1.0% [0.5-1.6] | 0.8% [0.4-1.2] |
| From 2.625      | 3.0% [2.4-3.6] | 2.6% [1.9-3.4]  | 0.9% [0.4-1.4] | 0.5% [0.2-0.9] |
| From 3.125      | 2.5% [1.9-3.1] | 2.2% [1.4-2.9]  | 0.7% [0.3-1.2] | 0.5% [0.1-0.8] |
| From 3.625      | 2.2% [1.7-2.8] | 2.1% [1.4-2.8]  | 1.1% [0.5-1.6] | 0.5% [0.2-0.9] |
| From 4.25 years | 2.1% [1.6-2.6] | 2.1% [1.4-2.8]  | 1.2% [0.6-1.7] | 0.2% [0.0-0.5] |
| From 5.25 years | 1.5% [1.1-2.0] | 2.1% [1.3-2.8]  | 1.1% [0.5-1.7] | 0.3% [0.0-0.6] |
| From 6.25 years | 1.2% [0.8-1.7] | 1.9% [1.1-2.6]  | 1.0% [0.4-1.6] | 0.3% [0.0-0.9] |
| From 7.25 years | 1.3% [0.7-1.8] | 1.9% [0.9-2.9]  | 1.0% [0.3-1.8] | 0.4% [0.0-0.9] |
| From 8.25 years | 0.8% [0.3-1.3] | 1.6% [0.7-2.6]  | 0.9% [0.2-1.6] | 0.4% [0.0-0.8] |

Supplemental Table 6: Cumulative five-year horizon risk for multiple islet autoantibodies from respective landmark age by genetic risk score in general population children with the HLA DR3/4-DQ8 or DR4-DQ8/DR4-DQ8 genotypes

| <b>Landmark age</b> | <b>≤ 1<sup>st</sup> quartile of genetic risk score</b> | <b>&gt; 1<sup>st</sup> and &lt; 3<sup>rd</sup> quartile of genetic risk score</b> | <b>≥ 3<sup>rd</sup> quartile of genetic risk score</b> |
|---------------------|--------------------------------------------------------|-----------------------------------------------------------------------------------|--------------------------------------------------------|
| From 7.5 months     | 2.3% [1.4-3.3]                                         | 4.5% [3.6-5.4]                                                                    | 9.8% [7.9-11.7]                                        |
| From 1.125 years    | 1.9% [1.0-2.7]                                         | 3.9% [3.0-4.7]                                                                    | 8.9% [7.0-10.7]                                        |
| From 1.625 years    | 1.7% [0.9-2.5]                                         | 3.2% [2.4-4.0]                                                                    | 7.8% [6.1-9.5]                                         |
| From 2.125 years    | 1.2% [0.5-1.9]                                         | 2.8% [2.1-3.6]                                                                    | 6.8% [5.2-8.4]                                         |
| From 2.625 years    | 0.9% [0.3-1.5]                                         | 2.4% [1.7-3.1]                                                                    | 5.9% [4.4-7.5]                                         |
| From 3.125 years    | 0.8% [0.3-1.4]                                         | 2.0% [1.4-2.6]                                                                    | 5.0% [3.6-6.5]                                         |
| From 3.625 years    | 1.0% [0.4-1.7]                                         | 1.8% [1.2-2.4]                                                                    | 4.0% [2.6-5.2]                                         |
| From 4.25 years     | 1.3% [0.6-2.0]                                         | 1.9% [1.3-2.5]                                                                    | 3.3% [2.1-4.5]                                         |
| From 5.25 years     | 1.2% [0.5-1.9]                                         | 1.9% [1.3-2.6]                                                                    | 2.0% [1.1-3.0]                                         |
| From 6.25 years     | 1.4% [0.6-2.3]                                         | 1.6% [0.9-2.2]                                                                    | 1.1% [0.4-1.8]                                         |
| From 7.25 years     | 1.9% [0.5-3.2]                                         | 1.7% [0.8-2.5]                                                                    | 0.9% [0.2-1.5]                                         |
| From 8.25 years     | 1.6% [0.3-2.9]                                         | 1.4% [0.6-2.2]                                                                    | 0.1% [0.0-0.4]                                         |

Supplemental Figure 2: Exponential risk decay curves for multiple islet autoantibodies stratified by (A) children in European and U.S. sites, (B) sex, and (C) *INS* genotype. The relative 5-year risks for multiple islet autoantibodies is also shown for (D) children with the *INS* AA genotype as compared to other *INS* genotypes, and (E) for children with the *HLA* DR3/DR4-DQ8 genotype compared to children with the *HLA* DR4-DQ8/DR4-DQ8 or DR4-DQ8/DR8 genotypes (black line) and compared to children with the DR3/3 genotypes (blue line).

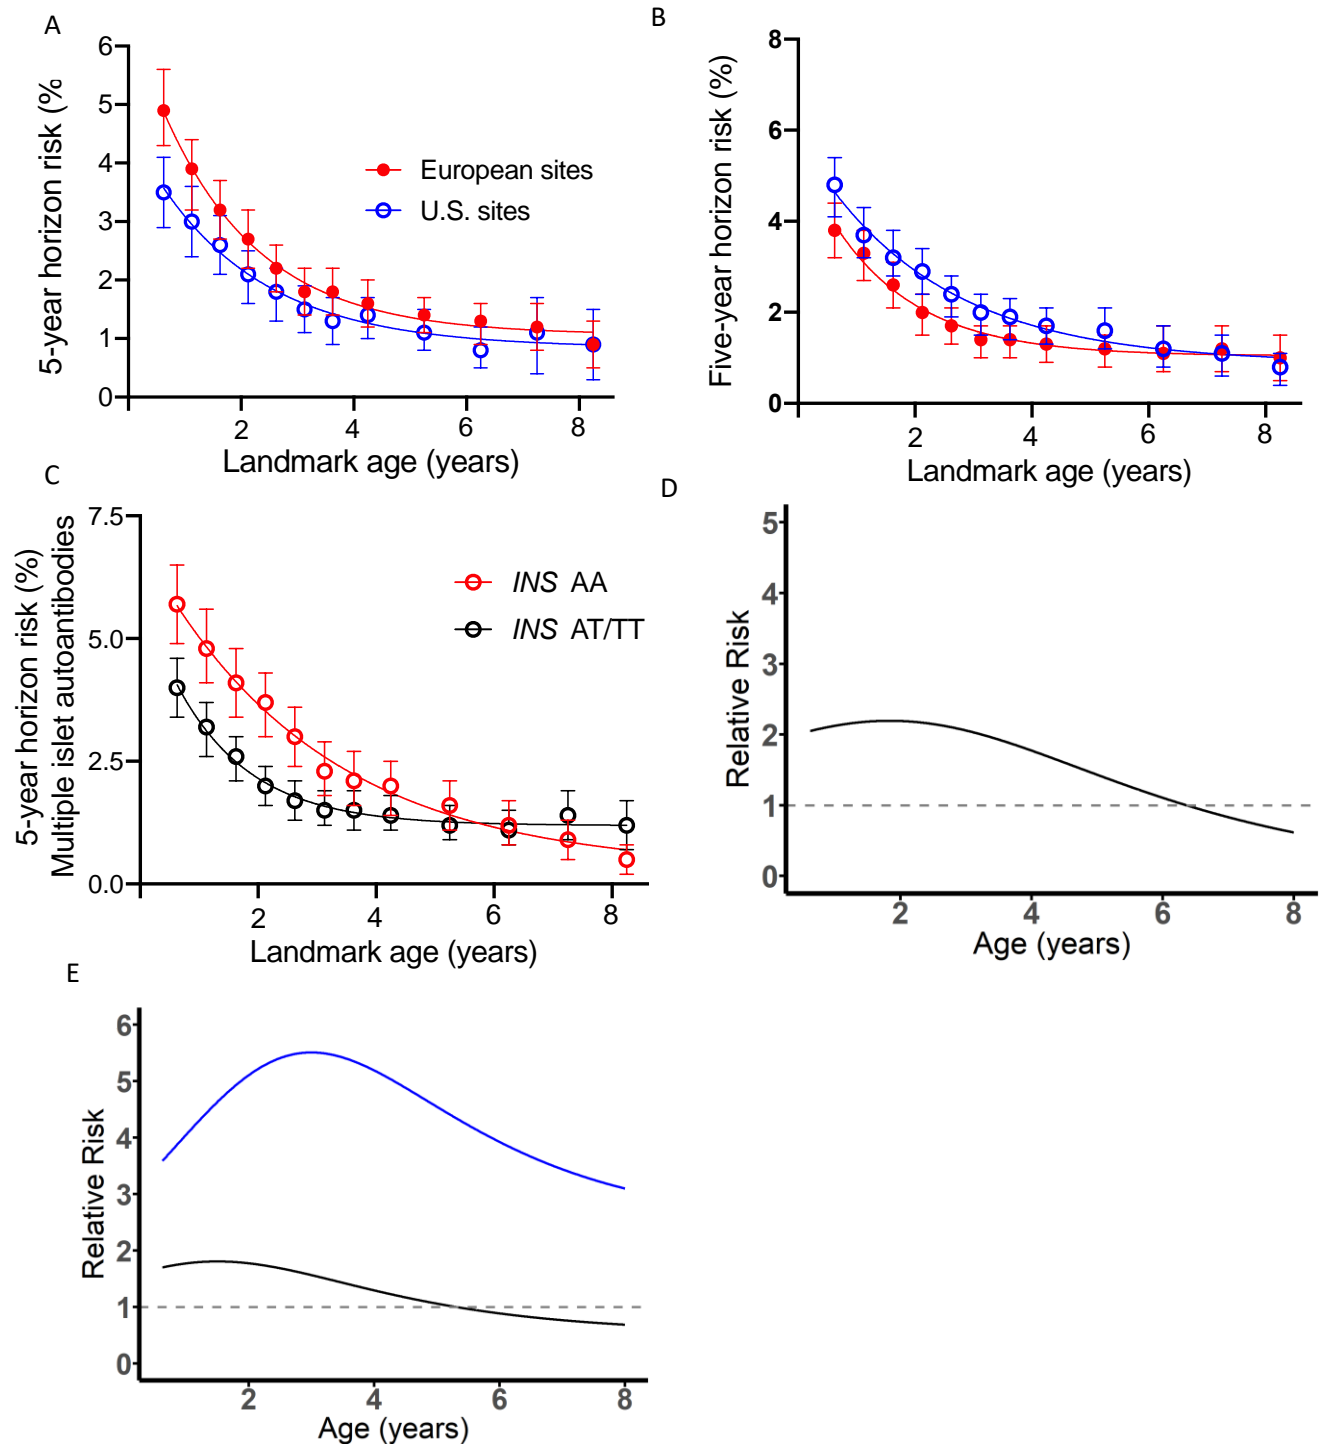

Supplemental Table 7: Relative cumulative five-year horizon risks for multiple islet autoantibodies and respective 95% confidence intervals at different timepoints

| <b>Age</b>  | <b>GRS highest quartile vs. lowest quartile</b> | <b>GRS highest quartile vs. middle quartiles</b> | <b>DR3/4-DQ8 vs. DR3/3</b> | <b>DR3/4-DQ8 vs. DR4-DQ8/DR4-DQ8 or DR4-DQ8/DR8</b> |
|-------------|-------------------------------------------------|--------------------------------------------------|----------------------------|-----------------------------------------------------|
| 0.625 years | 4.2 [2.7-6.5]                                   | 2.2 [1.6-2.9]                                    | 3.6 [2.5-5.3]              | 1.7 [1.4-2.1]                                       |
| 2.125 years | 5.7 [3.1-10.5]                                  | 2.4 [1.7-3.5]                                    | 4.5 [2.6-7.8]              | 1.8 [1.3-2.5]                                       |
| 5.25 years  | 1.8 [0.8-3.8]                                   | 1.1 [0.6-2.0]**                                  | 5.0 [2.0-12.5]             | 1.0 [0.6-1.5]***                                    |
| 6.25 years  | 1.0 [0.4-2.3]*                                  | 0.8 [0.4-1.8]***                                 | 3.5 [1.4-9.0]              | 0.8 [0.5-1.4]***                                    |

\*  $P=0.003$  vs 0.625 years; \*\*  $P=0.001$  vs 0.625 years; \*\*\*  $p<0.0001$  vs 0.625 years

Supplemental Table 8: Cumulative five-year horizon risk for islet autoantibody phenotypes from respective landmark age

| <b>Landmark age</b> | <b>IAA first to multiple</b> | <b>Multiple first</b> | <b>GADA first to multiple</b> | <b>Single IAA</b> | <b>Single GADA</b> |
|---------------------|------------------------------|-----------------------|-------------------------------|-------------------|--------------------|
| From 7.5 months     | 1.7% [1.5-2.0]               | 1.2% [0.9-1.4]        | 1.4% [1.2-1.7]                | 0.8% [0.6-1.0]    | 1.0% [0.8-1.2]     |
| From 13.5 months    | 1.2% [0.9-1.4]               | 1.0% [0.7-1.2]        | 1.4% [1.1-1.6]                | 0.7% [0.5-0.9]    | 1.0% [0.8-1.3]     |
| From 19.5 months    | 0.8% [0.6-1.0]               | 0.9% [0.7-1.1]        | 1.2% [0.9-1.4]                | 0.7% [0.5-0.9]    | 1.0% [0.8-1.3]     |
| From 25.5 months    | 0.6% [0.4-0.8]               | 0.7% [0.5-0.9]        | 1.1% [0.9-1.3]                | 0.6% [0.4-0.8]    | 1.0% [0.8-1.2]     |
| From 31.5 months    | 0.4% [0.3-0.6]               | 0.6% [0.4-0.7]        | 0.9% [0.7-1.1]                | 0.5% [0.4-0.7]    | 1.0% [0.8-1.3]     |
| From 37.5 months    | 0.3% [0.2-0.5]               | 0.5% [0.3-0.6]        | 0.8% [0.6-1.0]                | 0.5% [0.3-0.6]    | 1.0% [0.8-1.3]     |
| From 43.5 months    | 0.2% [0.1-0.3]               | 0.5% [0.3-0.6]        | 0.8% [0.6-1.0]                | 0.4% [0.3-0.5]    | 0.9% [0.7-1.1]     |
| From 51 months      | 0.2% [0.1-0.3]               | 0.5% [0.3-0.7]        | 0.7% [0.5-0.9]                | 0.4% [0.3-0.5]    | 0.9% [0.7-1.1]     |
| From 63 months      | 0.2% [0.1-0.2]               | 0.5% [0.3-0.6]        | 0.6% [0.4-0.8]                |                   |                    |
| From 75 months      | 0.1% [0.0-0.2]               | 0.5% [0.3-0.7]        | 0.4% [0.3-0.6]                |                   |                    |
| From 87 months      | 0.1% [0.0-0.2]               | 0.5% [0.3-0.7]        | 0.5% [0.3-0.7]                |                   |                    |
| From 99 months      | 0.1% [0.0-0.1]               | 0.4% [0.2-0.6]        | 0.4% [0.2-0.6]                |                   |                    |



Supplemental Figure 3: Exponential risk decay curves for islet autoantibody phenotypes stratified by HLA genotype.

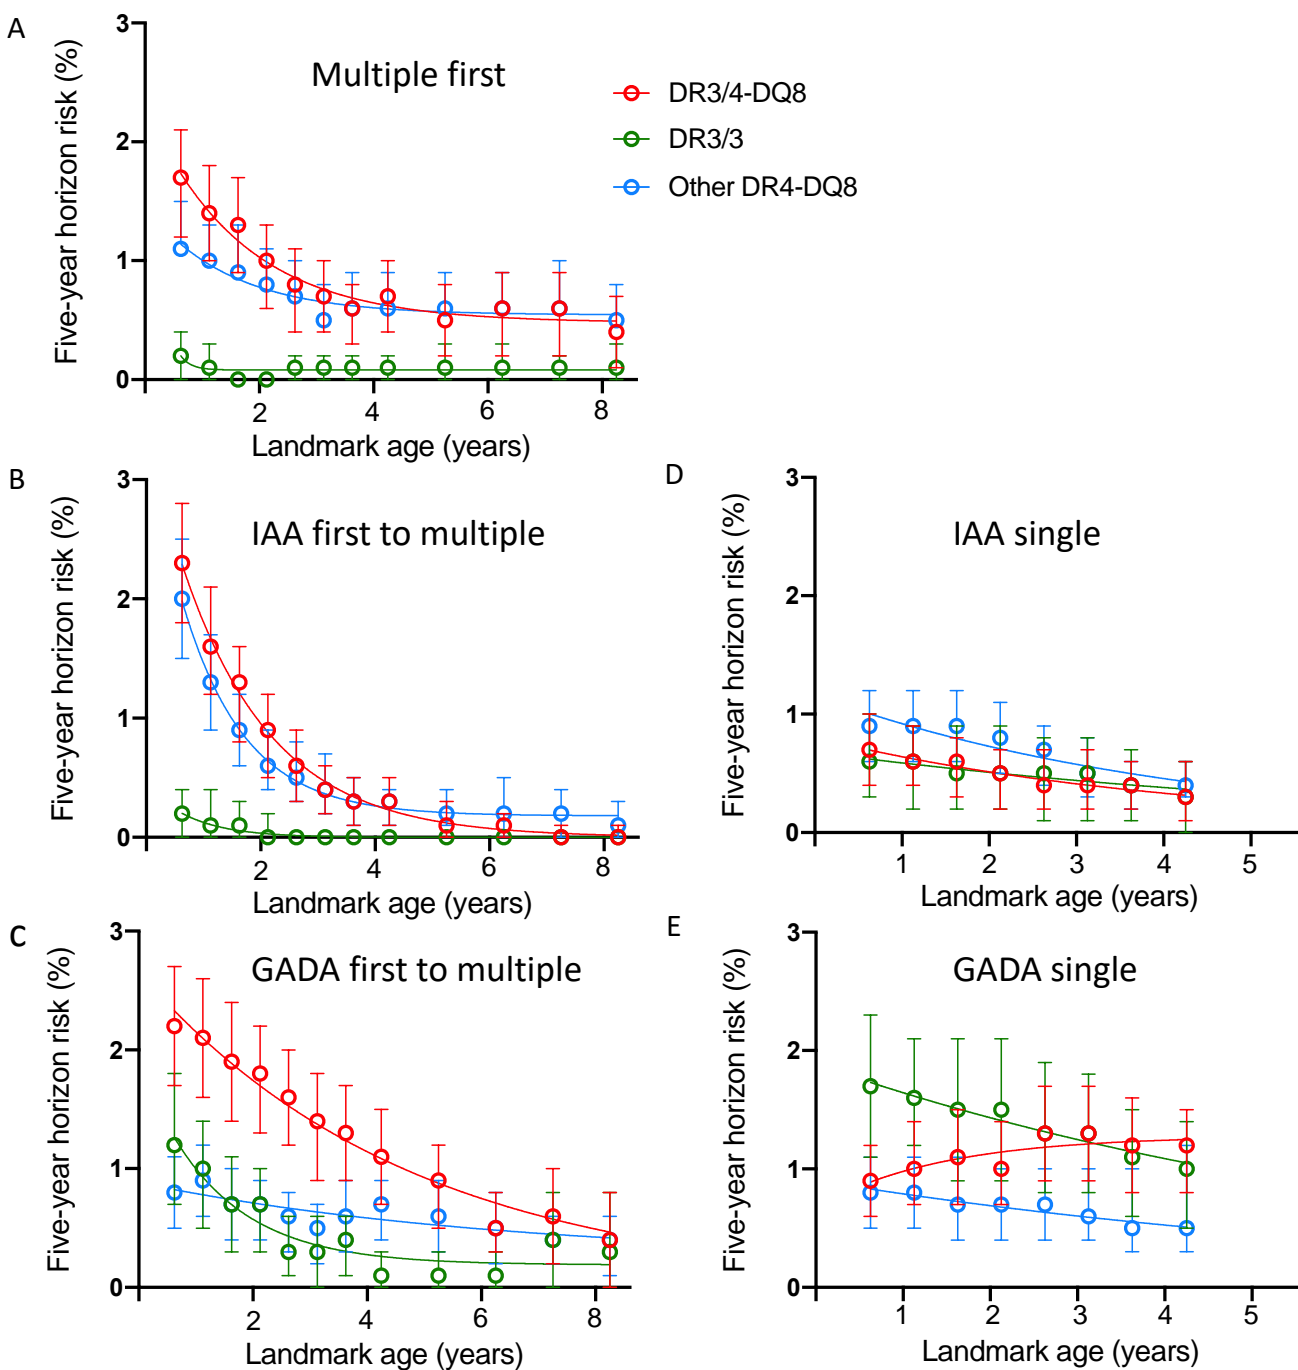

Supplemental Table 9: Cumulative 5-year risk for islet autoantibody phenotypes from respective landmark age by *HLA* genotype

| <i>Landmark age</i>    | <i>Risk after 5 years<br/>of follow-up</i> | <i>Risk after 5 years<br/>of follow-up</i> | <i>Risk after 5 years<br/>of follow-up</i> |
|------------------------|--------------------------------------------|--------------------------------------------|--------------------------------------------|
|                        | <i>DR3/DR4-DQ8</i>                         | <i>DR3/DR3</i>                             | <i>Other HLA<br/>genotype</i>              |
| IAA first to multiple  |                                            |                                            |                                            |
| From 0.625 years       | 2.3% [1.8-2.8]                             | 0.2% [0.0-0.4]                             | 2.0% [1.5-2.5]                             |
| From 1.125 years       | 1.6% [1.2-2.1]                             | 0.1% [0.0-0.3]                             | 1.3% [0.9-1.7]                             |
| From 1.625 years       | 1.2% [0.8-1.6]                             | 0.1% [0.0-0.2]                             | 0.9% [0.6-1.2]                             |
| From 2.125 years       | 0.9% [0.5-1.2]                             | 0% [0-0]                                   | 0.6% [0.4-0.9]                             |
| From 2.625 years       | 0.6% [0.3-0.9]                             | 0% [0-0]                                   | 0.5% [0.3-0.8]                             |
| From 3.125 years       | 0.4% [0.2-0.6]                             | 0% [0-0]                                   | 0.4% [0.2-0.7]                             |
| From 3.625 years       | 0.3% [0.1-0.5]                             | 0% [0-0]                                   | 0.3% [0.1-0.5]                             |
| From 4.25 years        | 0.3% [0.1-0.5]                             | 0% [0-0]                                   | 0.3% [0.1-0.4]                             |
| From 5.25 years        | 0.1% [0.0-0.3]                             | 0% [0-0]                                   | 0.2% [0.1-0.4]                             |
| From 6.25 years        | 0.1% [0.0-0.2]                             | 0% [0-0]                                   | 0.2% [0.0-0.5]                             |
| From 7.25 years        | 0.0% [0.0-0.1]                             | 0% [0-0]                                   | 0.2% [0.0-0.4]                             |
| From 8.25 years        | 0.0% [0.0-0.1]                             | 0% [0-0]                                   | 0.1% [0.0-0.3]                             |
| Multiple first         |                                            |                                            |                                            |
| From 0.625 years       | 1.7% [1.2-2.1]                             | 0.2% [0.0-0.4]                             | 1.1% [0.8-1.5]                             |
| From 1.125 years       | 1.4% [1.0-1.8]                             | 0.1% [0.0-0.3]                             | 1.0% [0.6-1.3]                             |
| From 1.625 years       | 1.3% [0.9-1.7]                             | 0% [0-0]                                   | 0.9% [0.6-1.3]                             |
| From 2.125 years       | 1.0% [0.6-1.3]                             | 0% [0-0]                                   | 0.8% [0.5-1.1]                             |
| From 2.625 years       | 0.8% [0.4-1.1]                             | 0.1% [0.0-0.2]                             | 0.7% [0.4-1.0]                             |
| From 3.125 years       | 0.7% [0.4-1.0]                             | 0.1% [0.0-0.2]                             | 0.5% [0.3-0.8]                             |
| From 3.625 years       | 0.6% [0.3-0.8]                             | 0.1% [0.0-0.2]                             | 0.6% [0.3-0.9]                             |
| From 4.25 years        | 0.7% [0.4-1.0]                             | 0.1% [0.0-0.2]                             | 0.6% [0.3-0.9]                             |
| From 5.25 years        | 0.5% [0.2-0.8]                             | 0.1% [0.0-0.3]                             | 0.6% [0.3-0.9]                             |
| From 6.25 years        | 0.6% [0.2-0.9]                             | 0.1% [0.0-0.3]                             | 0.6% [0.3-0.9]                             |
| From 7.25 years        | 0.6% [0.2-0.9]                             | 0.1% [0.0-0.2]                             | 0.6% [0.2-1.0]                             |
| From 8.25 years        | 0.4% [0.1-0.7]                             | 0.1% [0.0-0.2]                             | 0.5% [0.2-0.8]                             |
| GADA first to multiple |                                            |                                            |                                            |
| From 0.625 years       | 2.2% [1.7-2.7]                             | 1.2% [0.7-1.8]                             | 0.8% [0.5-1.1]                             |
| From 1.125 years       | 2.1% [1.6-2.6]                             | 1.0% [0.5-1.4]                             | 0.9% [0.6-1.2]                             |
| From 1.625 years       | 1.9% [1.4-2.4]                             | 0.7% [0.3-1.1]                             | 0.7% [0.4-1.0]                             |
| From 2.125 years       | 1.8% [1.3-2.2]                             | 0.7% [0.3-1.1]                             | 0.6% [0.4-0.9]                             |
| From 2.625 years       | 1.6% [1.2-2.0]                             | 0.3% [0.1-0.6]                             | 0.6% [0.3-0.8]                             |
| From 3.125 years       | 1.4% [0.9-1.8]                             | 0.3% [0.0-0.6]                             | 0.5% [0.2-0.7]                             |
| From 3.625 years       | 1.3% [0.9-1.7]                             | 0.4% [0.1-0.6]                             | 0.6% [0.3-0.9]                             |
| From 4.25 years        | 1.1% [0.7-1.5]                             | 0.1% [0.0-0.3]                             | 0.7% [0.4-0.9]                             |
| From 5.25 years        | 0.9% [0.5-1.2]                             | 0.1% [0.0-0.3]                             | 0.6% [0.3-0.9]                             |

|                  |                |                |                |
|------------------|----------------|----------------|----------------|
| From 6.25 years  | 0.5% [0.3-0.8] | 0.1% [0.0-0.3] | 0.5% [0.2-0.8] |
| From 7.25 years  | 0.6% [0.2-1.0] | 0.4% [0.0-0.8] | 0.4% [0.2-0.6] |
| From 8.25 years  | 0.4% [0.0-0.8] | 0.3% [0.0-0.8] | 0.4% [0.1-0.6] |
| Single IAA       |                |                |                |
| From 0.625 years | 0.7% [0.4-1.1] | 0.6% [0.3-1.0] | 0.9% [0.6-1.2] |
| From 1.125 years | 0.6% [0.4-0.9] | 0.6% [0.2-0.9] | 0.9% [0.6-1.2] |
| From 1.625 years | 0.6% [0.3-0.8] | 0.5% [0.2-0.9] | 0.9% [0.6-1.2] |
| From 2.125 years | 0.5% [0.2-0.7] | 0.5% [0.2-0.9] | 0.8% [0.5-1.1] |
| From 2.625 years | 0.4% [0.2-0.7] | 0.5% [0.1-0.8] | 0.7% [0.4-0.9] |
| From 3.125 years | 0.4% [0.2-0.7] | 0.5% [0.1-0.8] | 0.5% [0.3-0.8] |
| From 3.625 years | 0.4% [0.2-0.6] | 0.4% [0.1-0.7] | 0.4% [0.2-0.6] |
| From 4.25 years  | 0.3% [0.1-0.6] | 0.3% [0.1-0.7] | 0.4% [0.2-0.6] |
| Single GADA      |                |                |                |
| From 0.625 years | 0.9% [0.6-1.2] | 1.7% [1.1-2.3] | 0.8% [0.5-1.1] |
| From 1.125 years | 1.0% [0.7-1.4] | 1.6% [1.0-2.1] | 0.8% [0.5-1.1] |
| From 1.625 years | 1.1% [0.7-1.5] | 1.5% [0.9-2.1] | 0.8% [0.5-1.1] |
| From 2.125 years | 1.0% [0.7-1.4] | 1.5% [0.9-2.1] | 0.7% [0.4-1.0] |
| From 2.625 years | 1.3% [0.9-1.7] | 1.3% [0.8-1.8] | 0.7% [0.4-0.9] |
| From 3.125 years | 1.3% [1.0-1.8] | 1.3% [0.8-1.8] | 0.7% [0.4-0.9] |
| From 3.625 years | 1.2% [0.8-1.6] | 1.1% [0.6-1.5] | 0.6% [0.4-0.9] |
| From 4.25 years  | 1.2% [0.8-1.5] | 1.0% [0.5-1.4] | 0.5% [0.3-0.8] |

Supplemental Table 10: Sensitivity and positive predictive value of screening for islet autoantibodies

| Screening Age                       | Positive predictive value* [95 % CI] | Sensitivity † [95% CI] |
|-------------------------------------|--------------------------------------|------------------------|
| Multiple autoantibodies as positive |                                      |                        |
| 1 year                              | 84.0% [60.7-93.5]                    | 6.6% [4.3-10.0]        |
| 2 years                             | 68.1% [57.6-76.0]                    | 24.2% [19.7-29.2]      |
| 3 years                             | 55.5% [47.0-62.6]                    | 33.5% [29.5-38.9]      |
| 4 years                             | 51.6% [44.1-58.1]                    | 37.2% [32.0-42.6]      |
| 5 years                             | 49.6% [42.1-56.1]                    | 34.1% [29.1-39.6]      |
| 6 years                             | 47.7% [40.0-54.4]                    | 30.8% [25.9-36.1]      |
| 7 years                             | 47.7% [39.4-55.0]                    | 26.9% [22.3-32.1]      |
| 8 years                             | 49.4% [39.3-57.7]                    | 20.8% [16.7-25.7]      |
| Any autoantibodies as positive      |                                      |                        |
| 1 year                              | 49.5% [39.1-58.2]                    | 19.3% [15.3-24.1]      |
| 2 years                             | 41.8% [35.0-47.9]                    | 37.2% [32.0-42.6]      |
| 3 years                             | 33.9% [28.4-39.0]                    | 45.3% [39.9-50.9]      |
| 4 years                             | 32.8% [27.9-37.4]                    | 46.2% [40.8-51.8]      |
| 5 years                             | 29.1% [24.4-33.6]                    | 41.1% [35.8-46.6]      |
| 6 years                             | 27.9% [23.1-32.4]                    | 35.3% [30.2-40.8]      |
| 7 years                             | 28.5% [23.3-33.4]                    | 30.8% [25.9-36.1]      |
| 8 years                             | 29.7% [23.4-35.5]                    | 23.9% [19.5-28.9]      |
| Single autoantibodies as positive   |                                      |                        |
| 1 year                              | 24.5% [20.5-28.2]                    | 12.4% [9.1-16.5]       |
| 2 years                             | 14.9% [11.3-18.3]                    | 13.0% [17.2-26.3]      |
| 3 years                             | 12.2% [8.7-15.6]                     | 11.8% [8.6-15.9]       |
| 4 years                             | 11.5% [7.9-14.9]                     | 9.1% [6.3-12.8]        |
| 5 years                             | 9.2% [5.8-12.5]                      | 6.9% [4.6- 10.4]       |
| 6 years                             | 10.3% [6.4-14.1]                     | 4.5% [2.7-7.5]         |
| 7 years                             | 11.6% [6.8-16.1]                     | 3.9% [2.2-6.8]         |
| 8 years                             | 11.8% [5.8-17.4]                     | 3.0% [1.5-5.7]         |

\* Positive predictive value refers to the five-year horizon risk to develop type 1 diabetes from the screening age.

† Sensitivity was calculated as the proportion of the total number of children in the TEDDY study who developed type 1 diabetes by age 12 years.

Supplemental Figure 4: Models of multiple islet autoantibody pathogenesis based on the landmark analysis of the TEDDY study.

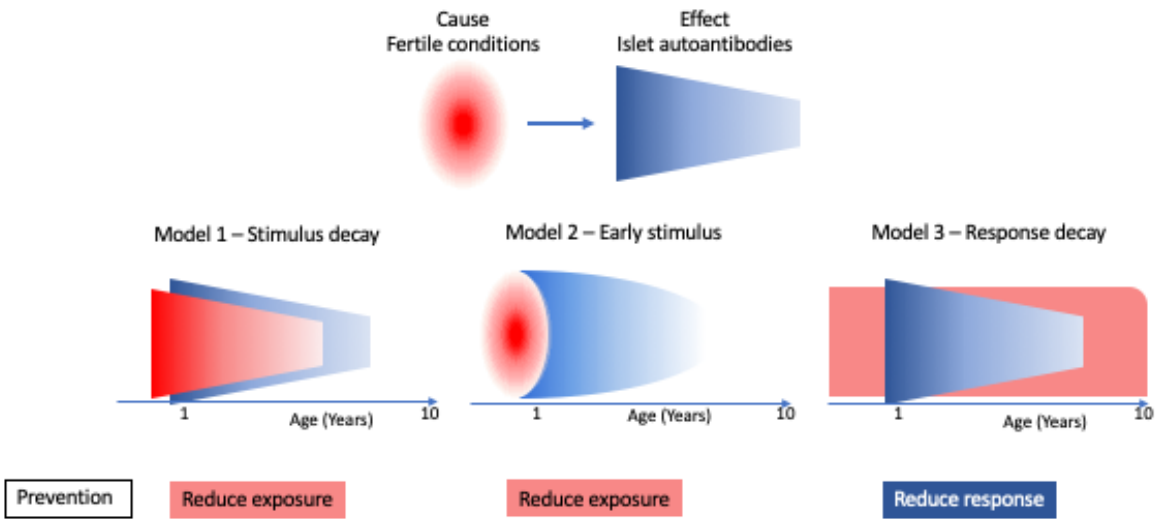

Supplement: Supplementary file 1 [file 26193239]
